# Supplementary material for: A silicon nanowire–reduced graphene oxide composite as a high-performance lithium ion battery anode material
Source: Royal Society of Chemistry journal article supplement (doi:10.1039/c3nr05093a), 2014-01-01
Supplement: c3nr05093a.pdf [file c3nr05093a.pdf]

## Supplementary Information

### **Silicon Nanowires-Reduced Graphene Oxide Composite as a High-Performance Lithium Ion Battery Anode Material**

Jian-Guo Ren,<sup>a</sup> Chundong Wang,<sup>a</sup> Qi-Hui Wu,<sup>\*b</sup> Xiang Liu,<sup>c</sup> Yang Yang,<sup>a</sup> Lifang He,<sup>a</sup> and Wenjun Zhang<sup>\*a</sup>

<sup>a</sup> Centre of Super-Diamond and Advanced Films (COSDAF) and Department of Physics and Materials Science, City University of Hong Kong, Hong Kong SAR, P. R. China. E-mail: apwjzh@cityu.edu.hk; Fax: 852-3442-0538; Tel: 852-3442-7433.

<sup>b</sup> Department of Chemistry, College of Chemistry and Life Science, Quanzhou Normal University, Quanzhou 362000, P. R. China. E-mail: qhwu@qztc.edu.cn.

<sup>c</sup> Institute of Advanced Materials, Nanjing University of Technology, Nanjing 210009, P. R. China.

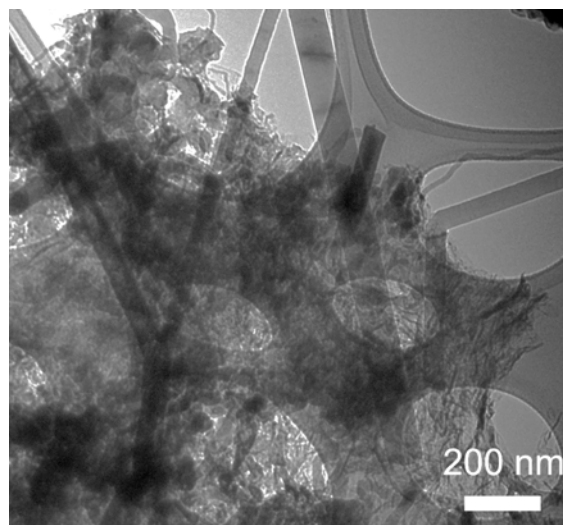

Figure S1. TEM image of the CVD-synthesized Si NWs-rGO composite. The well dispersed Si NWs were sandwiched between rGO sheets, achieving the lateral contact between NW and rGO sheet.

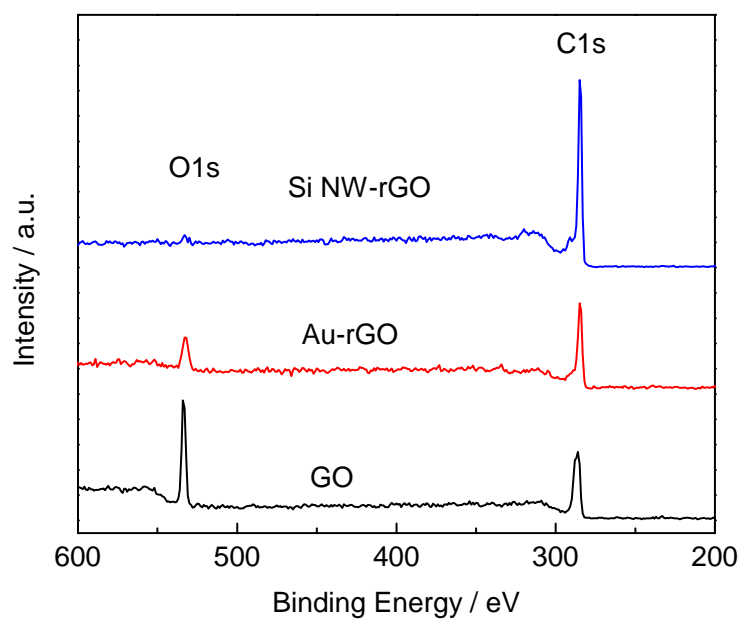

Figure S2. XPS survey spectra of the GO, Au-rGO, and Si NWs-rGO samples. C/O ratios for GO, Au-rGO, and Si NWs-rGO were calculated to be 2.39, 4.05, and 25.04, respectively.

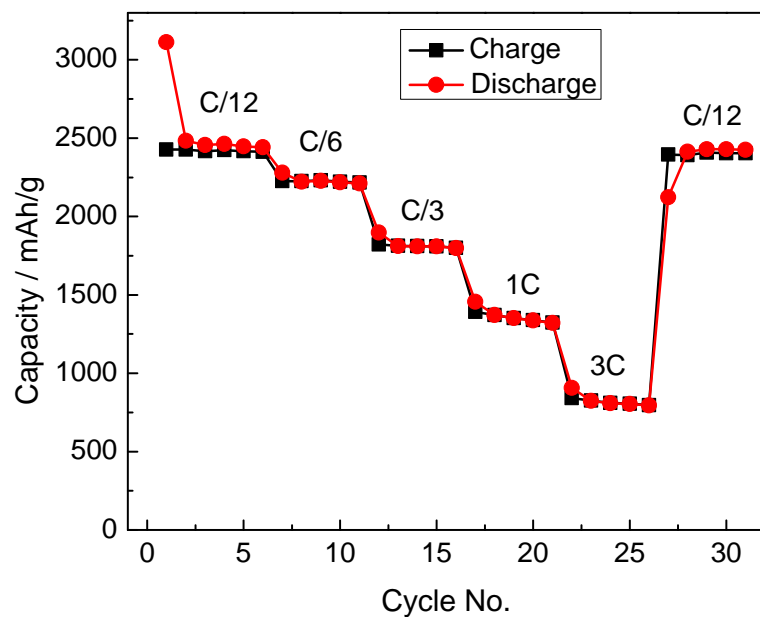

Figure S3. Rate capabilities of Si NWs-rGO composite electrode ( $1C = 3.6 \text{ A g}^{-1}$ ).

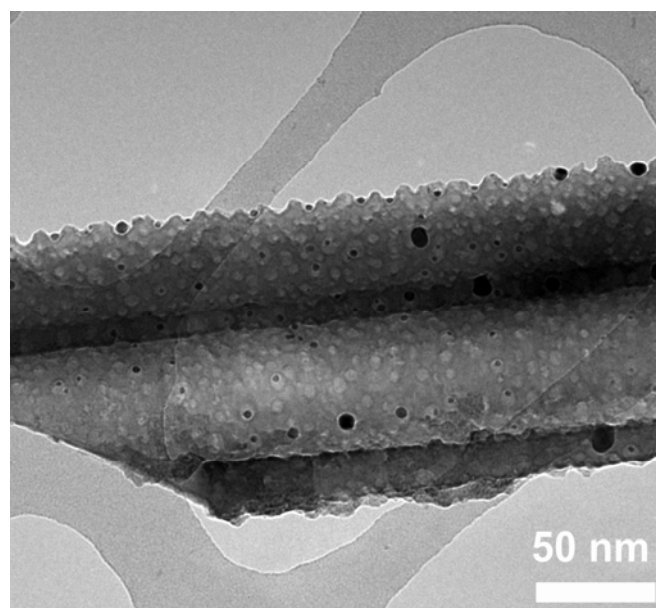

Fig S4. TEM image of a Si NW after 100 cycles at C/3 rate. The Si NW was transformed to a porous structure, and its diameter increased to about 120 nm.
